# Supplementary material for: Glycolytic metabolism is essential for CCR7 oligomerization and dendritic cell migration
Source: PubMed Central journal article supplement (PMC6018630; doi:10.1038/s41467-018-04804-6), 2018-06-25
Supplement: 41467_2018_4804_MOESM1_ESM.pdf [file 41467_2018_4804_MOESM1_ESM.pdf]

Supplementary information

**Glycolytic metabolism is essential for CCR7 oligomerization and dendritic cell migration**

Guak *et al.*

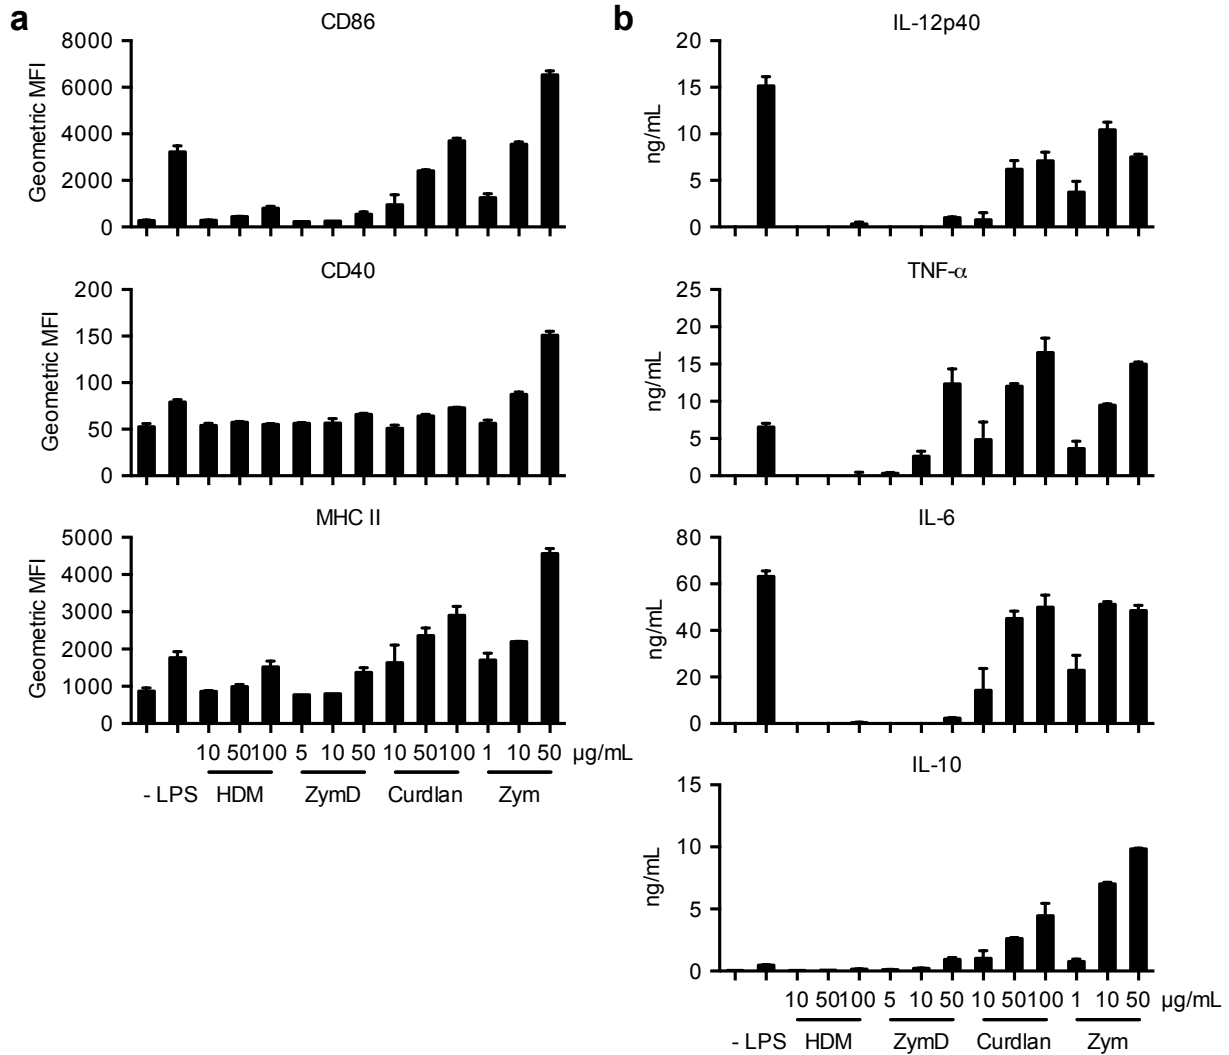

**Supplementary Figure 1 – Surface marker expression and cytokine production by differentially-activated DCs.**

(a) Expression of surface markers CD86, CD40, and MHC II and (b) production of cytokines IL-12p40, TNF- $\alpha$ , IL-6, and IL-10, were determined after stimulation with increasing doses of activators for 18h. Data in (a,b) are 1 experiment representative of at least 3 experiments (mean and s.d. of duplicates).

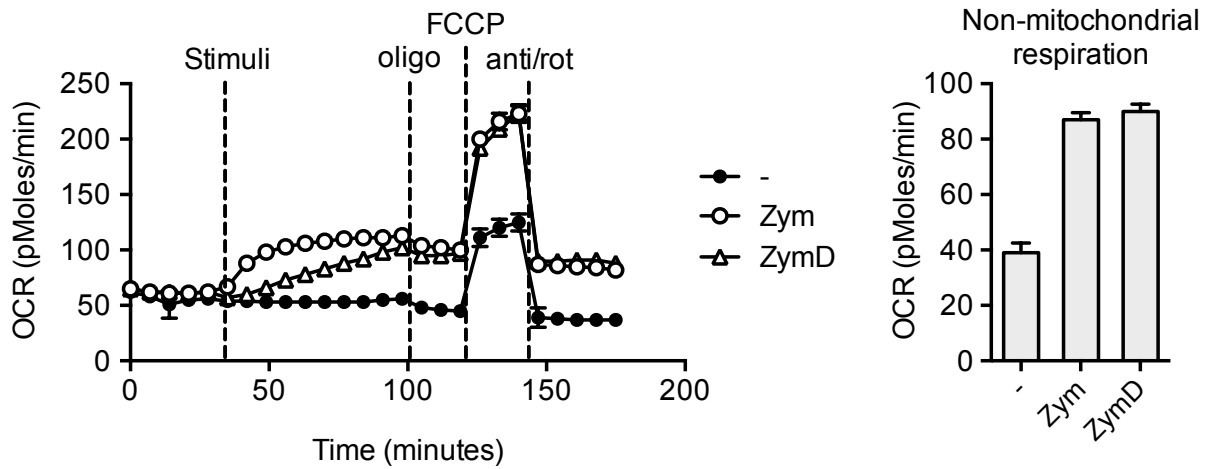

**Supplementary Figure 2 – Rapid oxygen consumption induced by Zym and ZymD is primarily non-mitochondrial.**

DCs were untreated or stimulated with Zym and ZymD, followed by treatment with oligomycin, FCCP, and antimycin/rotenone. The antimycin and rotenone inhibit mitochondrial respiration, and the remaining oxygen consumption is non-mitochondrial. Data shown are 1 experiment representative of 3 experiments (mean and s.e.m. of 6 replicates).

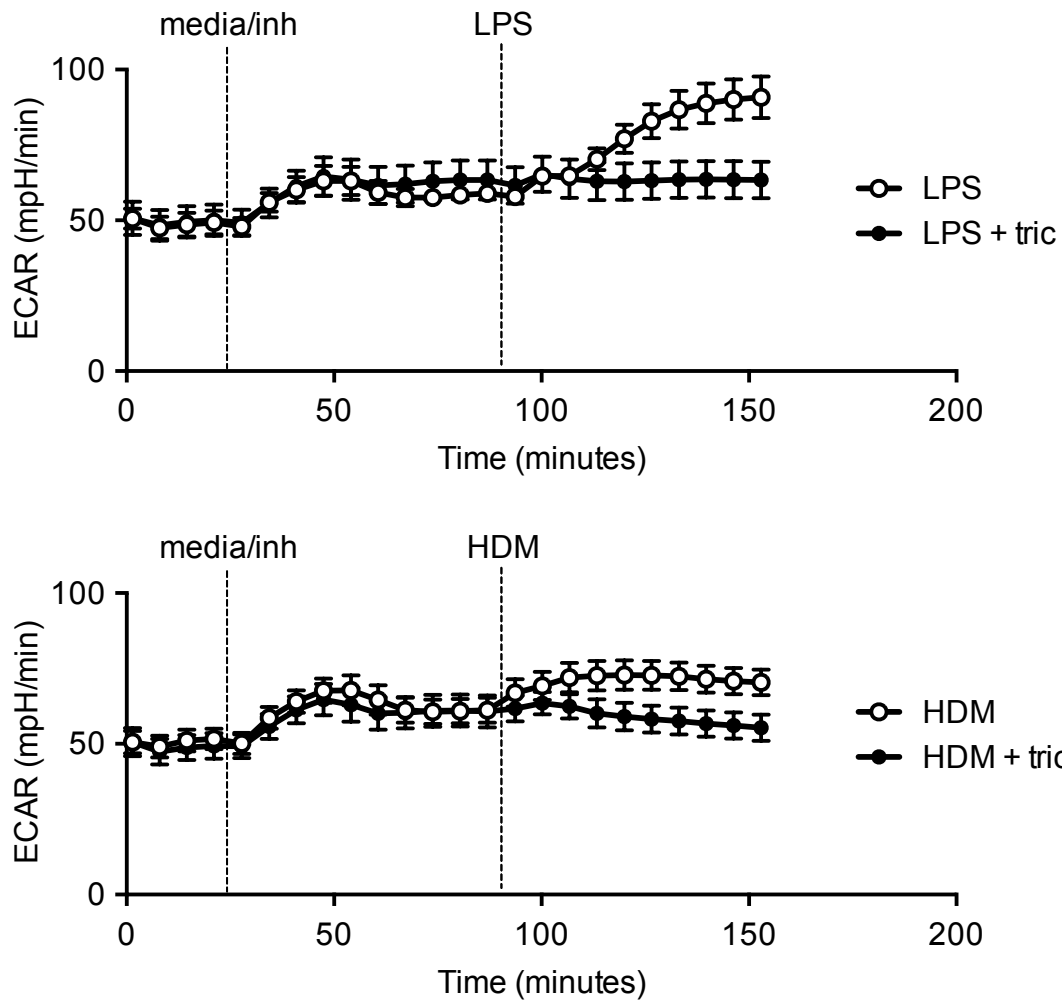

**Supplementary Figure 3 – Early glycolytic flux by LPS and HDM is prevented by AKT inhibition.**

ECAR of DCs treated with or without AKT inhibitor triciribine for 1h and stimulated with LPS (top) or HDM (bottom) for 1h. Data are of 1 experiment representative of 2 independent experiments (mean and s.e.m. of 6 replicates).

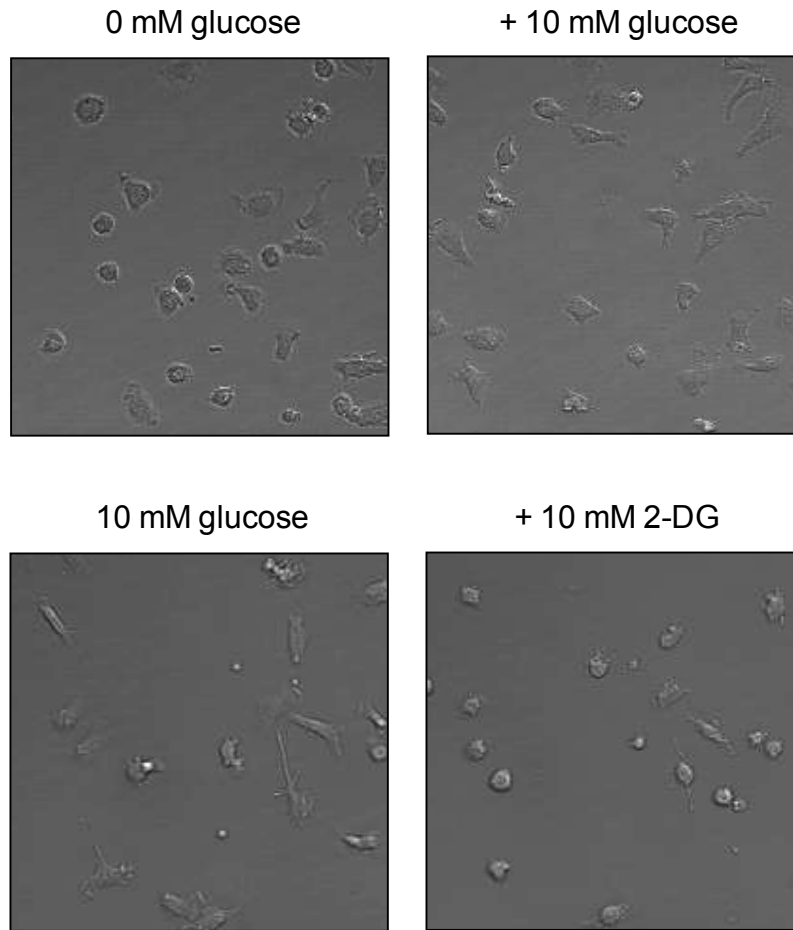

**Supplementary Figure 4 – Inhibition of glycolysis results in rounded cell morphology.** Representative images from the live imaging experiment analyzed in Fig. 5. DCs cultured in the absence of glucose (top), and in the presence of glucose (bottom). Glucose and 2-DG were added to the top and bottom conditions, respectively, and cell shape was examined.

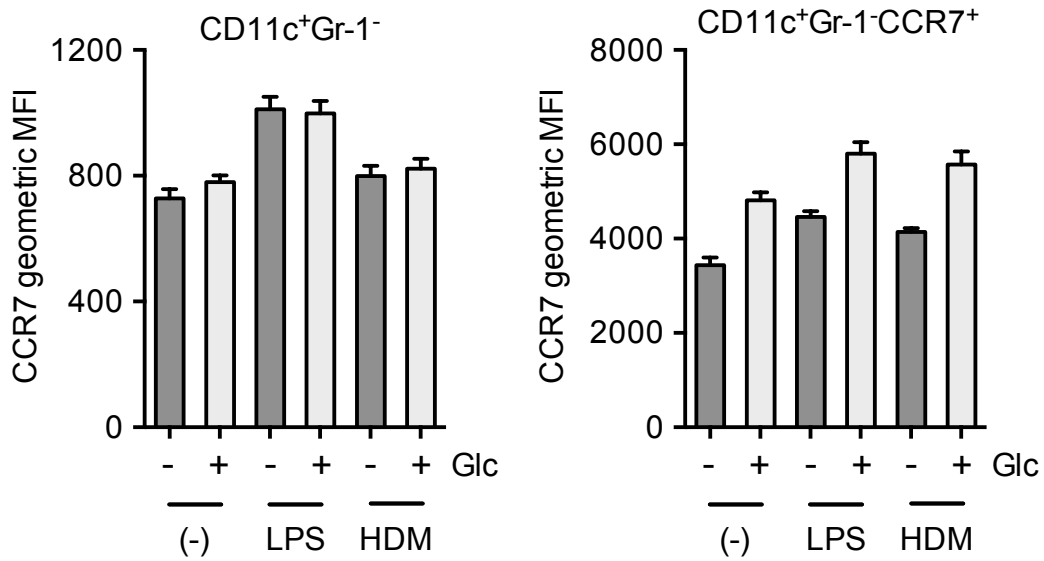

**Supplementary Figure 5 – CCR7 expression on DCs.**

Geometric MFI of CCR7 in the CD11c<sup>+</sup>Gr-1<sup>-</sup> (left) and CD11c<sup>+</sup>Gr-1<sup>-</sup>CCR7<sup>+</sup> (right) populations of DCs left unstimulated or activated 6h with LPS or HDM in the presence or absence of glucose. Data are of 1 experiment representative of 3 independent experiments (mean and s.d. of triplicates).

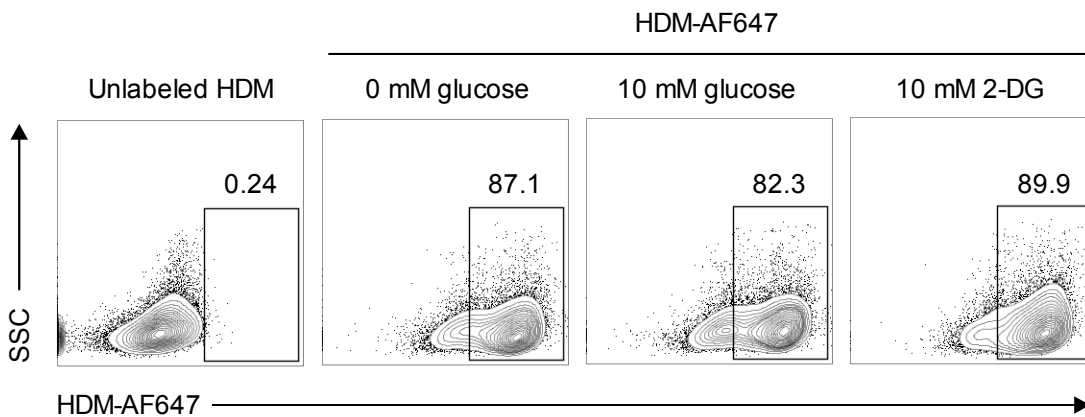

**Supplementary Figure 6 – Inhibition of glycolysis does not affect phagocytosis of HDM by DCs.**

HDM labeled with Alexa Fluor 647 (AF647) dye was added to DCs cultured in the presence or absence of glucose or 2-DG for 4h. Data shown are 1 experiment representative of 2 experiments.

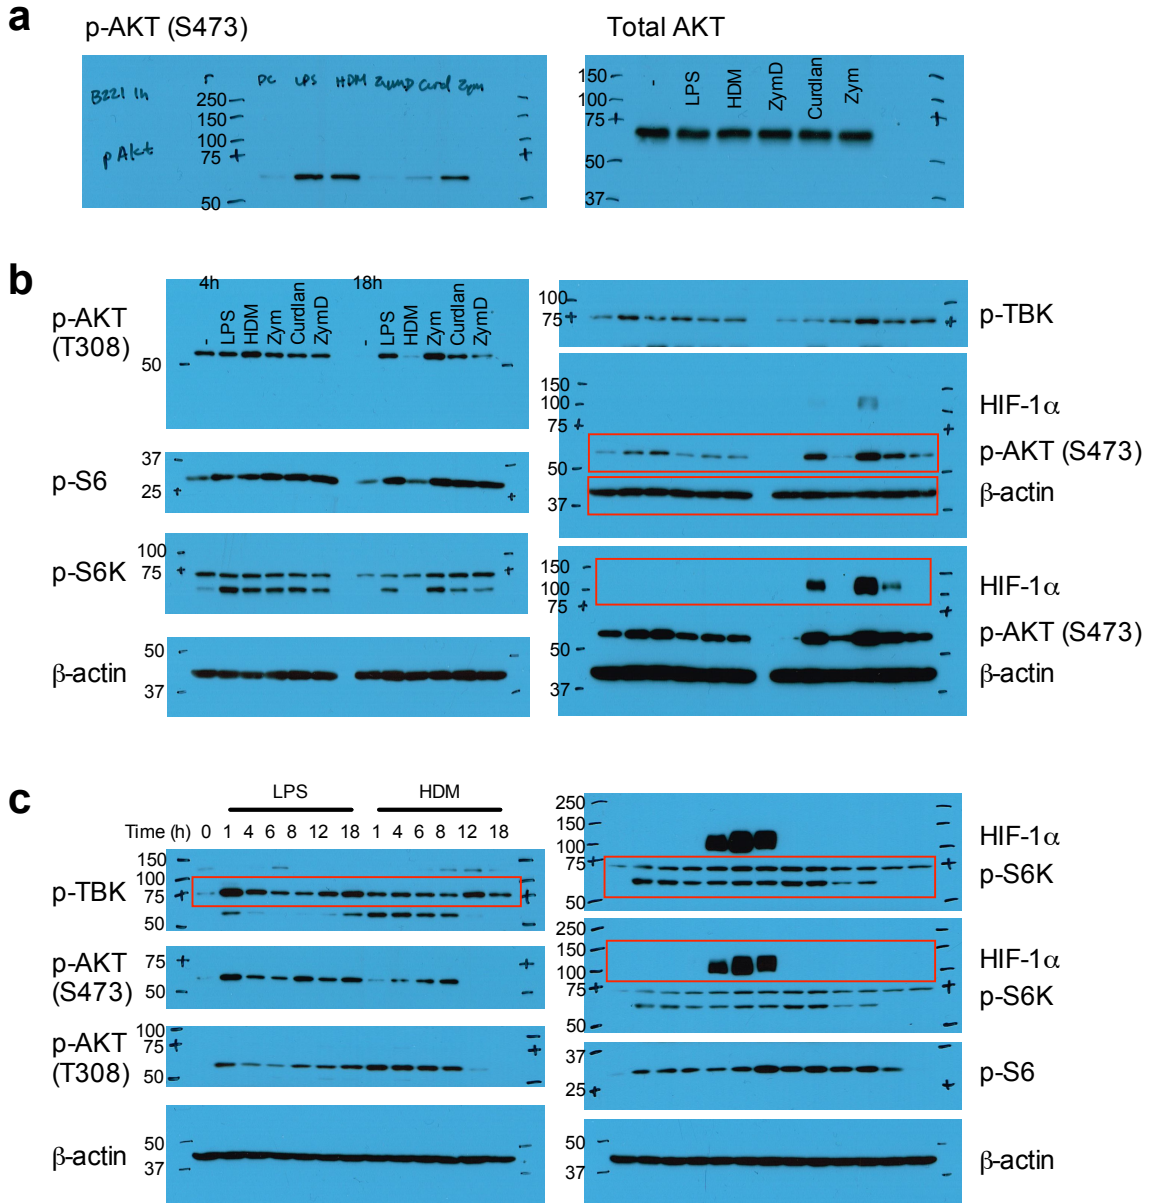

**Supplementary Figure 7 – Original immunoblot scans.**

Original immunoblot scans corresponding to (a) Fig. 2b, (b) Fig. 4b, and (c) Fig. 4c.
